# Supplementary material for: Major genes determining yield-related traits in wheat and barley
Source: PubMed Central journal article supplement (PMC5440550; doi:10.1007/s00122-017-2880-x), 2017-03-17
Supplement: 122_2017_2880_MOESM1_ESM.pdf [file 122_2017_2880_MOESM1_ESM.pdf]

Table S1. Main genes of barley (*Hordeum vulgare*) determining yield components.

| Approach / locus                                                                                                               | Locus/gene/protein class                                                                                            | Function/orthologs                                                                                                                                   | Modifiers/regulators                                                                                                                                                                                          | Affected yield components                                                                                   | References                                                                |
|--------------------------------------------------------------------------------------------------------------------------------|---------------------------------------------------------------------------------------------------------------------|------------------------------------------------------------------------------------------------------------------------------------------------------|---------------------------------------------------------------------------------------------------------------------------------------------------------------------------------------------------------------|-------------------------------------------------------------------------------------------------------------|---------------------------------------------------------------------------|
| <b>Transcription factors and other regulators – spikelet development, inflorescence architecture and growth – grain number</b> |                                                                                                                     |                                                                                                                                                      |                                                                                                                                                                                                               |                                                                                                             |                                                                           |
| Mutant                                                                                                                         | <i>Vrs1</i> ( <i>SIX-ROWED SPIKE 1</i> ); a homeodomain-leucine zipper I-class (HD-Zip I) type transcription factor | Cell division and development in the lateral spikelets; no orthologs                                                                                 | <i>Vrs1.b</i> – wild type allele, <i>VRS1</i> – loss of function mutant; modifiers – <i>INT</i> alleles (see below)                                                                                           | <i>VRS1</i> – six-row spikes, reduction in the number of tillers<br><i>Vrs1.b</i> – two-rowed spikes        | (Komatsuda et al. 2007; Lundqvist et al. 1997; Ramsay et al. 2011)        |
| Mutant                                                                                                                         | <i>INT</i> ( <i>INTERMEDIUM</i> ); HD-ZIP I-class homeobox transcription factor                                     | Modifier of lateral spikelet fertility; orthologs: maize <i>TEOSINTE BRANCHED 1</i> ( <i>TB1</i> ) and barley <i>Photoperiod-1</i> ( <i>Ppd-H1</i> ) | <i>INT-C</i> alleles – quantitative variation; <i>vrs1.a</i> in six-rowed (loss of function allele) is complemented by <i>Int-c.a</i> allele and in two-rowed <i>Vrs1.b</i> is complemented by <i>int-c.b</i> | Variations in male fertility and grain development from two-rowed to six-rowed                              | (Lundqvist et al. 1997; Lundqvist and Lundqvist 1988; Ramsay et al. 2011) |
| Mutant, positional cloning                                                                                                     | <i>Ppd-H1</i> ( <i>Photoperiod-1</i> ), a member of pseudo-response regulator ( <i>PPR</i> ) family genes           | The major determinant of photoperiod response; ortholog in wheat                                                                                     | <i>ppd-H1</i> mutant, reduced photoperiod responsiveness altered circadian expression of the photoperiod pathway gene <i>CONSTANS</i> and reduced expression of its downstream target, <i>FT</i>              | Induction of flowering, highly advantageous in spring-sown varieties                                        | (Turner et al. 2005)                                                      |
| Natural mutation, positional cloning, gene isolation                                                                           | <i>com2</i> ( <i>compositum 2</i> ); AP2/ERF transcription factors                                                  | Branch repression pathway; orthologs in tetraploid and hexaploid wheat                                                                               | <i>COM2</i> expression is regulated by <i>Six-rowed spike 4</i> influencing branch repression; <i>HvIDS1</i> is a putative down-stream target of <i>COM2</i>                                                  | Spikelets are replaced by lateral secondary spikes; significantly more grains per spike, higher spike yield | (Poursarebani et al. 2015; Sharman 1994)                                  |

|                                           |                                                                                                                      |                                                                                                                                                                 |                                                                                                                                                                                                      |                                                                                                                                                                         |                                                               |
|-------------------------------------------|----------------------------------------------------------------------------------------------------------------------|-----------------------------------------------------------------------------------------------------------------------------------------------------------------|------------------------------------------------------------------------------------------------------------------------------------------------------------------------------------------------------|-------------------------------------------------------------------------------------------------------------------------------------------------------------------------|---------------------------------------------------------------|
| Mapping<br>MLOC_43830                     | <i>HvAP2 (APETALA 2)</i> ; transcription factor two, AP2 DNA-binding domain and miR172-binding site in its last exon | Perturbed interaction between miR172 and its corresponding binding site in the mRNA of <i>AP2</i> like transcription factor; orthologs in rice, wheat and maize | Mutant alleles – internode elongation is reduced in both the culm and the spike                                                                                                                      | A key controller of barley spike density                                                                                                                                | (Houston et al. 2013)                                         |
| Databases<br>MLOC_65101.1                 | <i>HvNAC005</i> ; NAC-a6 transcription factor                                                                        | Positive regulator of senescence                                                                                                                                | Over-expression – delayed development combined with precocious senescence; up regulation of genes involved in secondary metabolism, hormone metabolism, stress, signaling, development and transport | Nutrient remobilization related to senescence process                                                                                                                   | (Christiansen et al. 2016; 2011)                              |
| Mutant, mapping and cloning by sequencing | <i>Blade-On-Petiole 1 (BOP1)</i> and <i>BOP2</i> ; putative transcriptional coactivator in <i>A. thaliana</i>        | Developmental growth of vegetative and reproductive organs; partially conserved function between <i>Arabidopsis</i> and barley                                  | <i>BOP1/2</i> controls internode length and causes pleiotropic changes in spike development; haplotype diversity                                                                                     | Internode length, spike development                                                                                                                                     | (Jost et al. 2016)                                            |
| Natural mutations, mapping                | <i>dsp (dense spike)</i>                                                                                             | Controlling the barley spike and spikelet characteristics                                                                                                       | 28 alleles                                                                                                                                                                                           | A reduction in length of rachis internodes, shorter culms, compact spikes, smaller volume of dew (reduced risk of fungal infections and pre-harvest sprouting)          | (Shahinnia et al. 2012)                                       |
| Spontaneous mutation                      | <i>ert-a (erectoides-a)</i>                                                                                          | A second dense spike locus                                                                                                                                      | 43 alleles, <i>ert-a.6</i> shorter plants and kernels, reduced grain yield                                                                                                                           | Resistance to lodging, semi-compact spikes with dense basis, reduced culm length, improved culm strength, susceptibility to powdery mildew, virus and nematode diseases | (Druka et al. 2011; Franckowiak and Lundqvist 2012) (mapping) |

|                                                                                                     |                                                                |                                                                                                                                    |                                                                                                                                                                                                                                                  |                                                                                                                |                                                          |
|-----------------------------------------------------------------------------------------------------|----------------------------------------------------------------|------------------------------------------------------------------------------------------------------------------------------------|--------------------------------------------------------------------------------------------------------------------------------------------------------------------------------------------------------------------------------------------------|----------------------------------------------------------------------------------------------------------------|----------------------------------------------------------|
| Induced mutations, mapping                                                                          | <i>ert-k.32</i> ( <i>erectoides-k.32</i> )                     | Controlling culm length and spike architecture                                                                                     | <i>ert-k.32</i> – induced, approved as a cultivar; eight allelic <i>ert-k</i> mutants                                                                                                                                                            | Resistance to lodging; alternative to pleiotropic GR alleles of the <i>Sdw1</i> and <i>Uzu1</i>                | (Franckowiak and Lundqvist 2012; Kristensen et al. 2016) |
| <b>Genes of cytokinin metabolism – plant architecture – grain number</b>                            |                                                                |                                                                                                                                    |                                                                                                                                                                                                                                                  |                                                                                                                |                                                          |
| RNAi                                                                                                | <i>HvCKX1</i> cytokinin dehydrogenase enzyme HvCKX1            | CKX enzymes irreversibly degrade cytokinins, temporal and spatial control of cytokinin level; orthologs in wheat and other species | Multigene family<br>Decreased expression of the <i>HvCKX1</i> gene by RNAi silencing and CKX enzyme in the developing spikes                                                                                                                     | Higher number of seeds and spikes                                                                              | (Zalewski et al. 2010)                                   |
| RNAi                                                                                                | <i>HvCKX9</i> cytokinin dehydrogenase enzyme HvCKX9            | As above                                                                                                                           | One of multigene family<br>Decreased expression of the <i>HvCKX9</i> gene by RNAi silencing and CKX enzyme in the developing spikes                                                                                                              | Higher number of seeds and spikes                                                                              | (Zalewski et al. 2014; Zalewski et al. 2012)             |
| <b>Gibberellin signaling and metabolism – plant architecture – culm (stem) robustness/hardiness</b> |                                                                |                                                                                                                                    |                                                                                                                                                                                                                                                  |                                                                                                                |                                                          |
| Natural or induced mutations                                                                        | <i>Sdw</i> ( <i>semidwarf</i> ); <i>Sdw1/Denso</i> locus       | GR gene, GA-insensitive, GA signaling?                                                                                             | 53 mutants; numerous different mother cultivars<br><i>Sdw1/Denso</i> locus – first reported allele <i>sdw1.c</i> ; second allele – <i>sdw1.a</i> ; third <i>sdw1.d</i> the most important – main allele in modern European; fourth <i>sdw1.e</i> | Semi-dwarf, reduction of culm and rachis internode length and increased lodging resistance, reduced grain size | (Druka et al. 2011; Franckowiak and Lundqvist 2012)      |
| Mutant Hv287 Map based cloning                                                                      | <i>sdw3</i> ( <i>semidwarf 3</i> ) former <i>gai</i>           | GA-insensitive, GA signaling                                                                                                       | Monogenic recessive trait; lack of gene identity (unidentified)                                                                                                                                                                                  | Mild semi-dwarf, lodging-resistant                                                                             | (Börner et al. 1999; Vu et al. 2010)                     |
| Mutant                                                                                              | <i>sdw4</i> ( <i>semidwarf 4</i> )                             | GA-insensitive, GA signaling                                                                                                       | <i>sdw4.ba</i> – recessive, short-culm mutant with enlarged flag leaves                                                                                                                                                                          | semi-dwarf, enhanced lodging-resistant; enlarged flag leaf                                                     | (Franckowiak and Lundqvist 2012)                         |
| Natural mutants                                                                                     | <i>HvSln1</i> ( <i>Slender1</i> ) – mutation in DELLA proteins | GA-insensitive, GA signaling; ortholog of <i>Rht1</i> in wheat and <i>GAI</i> in                                                   | <i>sln1b</i> allele – single amino acid substitution in DELLA domain, recessive loss of function alleles                                                                                                                                         | Pleiotropic effects: semi-dwarf, slender-type plant architecture                                               | (Chandler et al. 2002; Wen et al. 2013)                  |

|                                                                                         |                                                                                                                     |                                                                                                                                                                   |                                                                                                                                                                                       |                                                                                                                                                                                                         |                                                       |
|-----------------------------------------------------------------------------------------|---------------------------------------------------------------------------------------------------------------------|-------------------------------------------------------------------------------------------------------------------------------------------------------------------|---------------------------------------------------------------------------------------------------------------------------------------------------------------------------------------|---------------------------------------------------------------------------------------------------------------------------------------------------------------------------------------------------------|-------------------------------------------------------|
|                                                                                         |                                                                                                                     | <i>Arabidopsis</i>                                                                                                                                                | (translational stop codon)                                                                                                                                                            |                                                                                                                                                                                                         |                                                       |
| Mutants                                                                                 | <i>Grd5</i><br>( <i>GIBBERELLIN-RESPONSIVE DWARF</i> ), CYPSSA – cytochrome P450 <i>ent</i> -kaurenoic acid oxidase | Involved in GA metabolism, the enzyme catalyzes the first step of the gibberellin biosynthetic pathway from <i>ent</i> -kaurenoic acid to GA12; ortholog in maize | <i>grd5</i> – gibberellin-responsive, three independent mutants contain mutations in a gene encoding a member of the CYP88A subfamily of cytochrome P450 enzymes,                     | Dwarfing                                                                                                                                                                                                | (Helliwell et al. 2001)                               |
| <b>Brassinosteroid (BR) signaling and metabolism – plant architecture – culm length</b> |                                                                                                                     |                                                                                                                                                                   |                                                                                                                                                                                       |                                                                                                                                                                                                         |                                                       |
| Natural mutation                                                                        | <i>Uzu1</i><br>(MLOC_5176; <i>UZU DWARF</i> ) brassinosteroid hormone receptor BRASSINOSTEROID-INSENSITIVE HvBRI1   | GR gene, BR insensitive, deficient in brassinosteroid biosynthesis; ortholog of the rice <i>D61</i>                                                               | Mutation in the brassinosteroid receptor causing an His-857 to Arg exchange in the kinase domain of the receptor<br><i>uzu1.a</i> allele – monogenic recessive mutation               | Short-culm in six-rowed barley in East Asia, highly resistant to lodging, upright plant architecture, low leaf angles (high photosynthetic efficiency; facilitates dense crop planting, heat sensitive) | (Chono et al. 2003; Dockter et al. 2014)              |
| Mutants                                                                                 | <i>brh</i> ( <i>brachytic</i> )                                                                                     | Deficient in brassinosteroid biosynthesis                                                                                                                         | A group of mutants (27 semidwarf mutants in 18 independent genetic loci, e.g. <i>brh1</i> , <i>bhr4.j</i> , <i>bhr8.ad</i> )                                                          | Reduced culm length, shorter kernels with lower weight but with an increased number of kernels per inflorescence, upright plant architecture                                                            | (Dahleen et al. 2005; Franckowiak and Lundqvist 2012) |
| <b>Other – plant architecture (culm and awn length), grain size</b>                     |                                                                                                                     |                                                                                                                                                                   |                                                                                                                                                                                       |                                                                                                                                                                                                         |                                                       |
| Mutants                                                                                 | <i>ari</i> ( <i>breviaristatum</i> )<br><i>ari-e GP</i> ( <i>erectoides</i> in cv. Golden Promise)                  | Semi dwarfing mutant                                                                                                                                              | 32 <i>ari</i> mutant alleles in Bowman near-isogenic lines, several hundred at the Nordic Genetic Resource Centre<br><i>ari-e</i> recessive mutant – Golden Promise (Liu et al. 2014) | Reduced awn length, a number of mutants have shortened culm, and upright arch                                                                                                                           | (Druka et al. 2011; Franckowiak and Lundqvist 2012)   |
| Homologs                                                                                | <i>PcG</i><br>Polycomb group protein complexes (PcG)                                                                | Involved in seed development and in response to external ABA, ultimately leading to                                                                               | Four homologs: <i>HvFIE</i> , <i>HvE(Z)</i> , <i>HvSu(z)12a</i> , and <i>HvSu(z)12b</i> . Gene expression is responsive to abscisic acid (ABA).                                       | Seed size                                                                                                                                                                                               | (Kapazoglou et al. 2010)                              |

|  |  |                                            |  |  |  |
|--|--|--------------------------------------------|--|--|--|
|  |  | chromatin compaction and<br>gene silencing |  |  |  |
|--|--|--------------------------------------------|--|--|--|
