# Supplementary material for: Major genes determining yield-related traits in wheat and barley
Source: PubMed Central journal article supplement (PMC5440550; doi:10.1007/s00122-017-2880-x), 2017-03-17
Supplement: 122_2017_2880_MOESM2_ESM.pdf [file 122_2017_2880_MOESM2_ESM.pdf]

Table S2. Main genes of wheat (*Triticum aestivum* L.) determining yield components.

| Approach / locus                                                                     | Gene/protein class                                                                                                                                                                   | Function/Orthologs                                                                                                                                                                                                | Alleles/Modifiers/Regulators                                                                                                                                                                                         | Affected yield components                                                                                                                                                                                                                                               | References                                                                                                      |
|--------------------------------------------------------------------------------------|--------------------------------------------------------------------------------------------------------------------------------------------------------------------------------------|-------------------------------------------------------------------------------------------------------------------------------------------------------------------------------------------------------------------|----------------------------------------------------------------------------------------------------------------------------------------------------------------------------------------------------------------------|-------------------------------------------------------------------------------------------------------------------------------------------------------------------------------------------------------------------------------------------------------------------------|-----------------------------------------------------------------------------------------------------------------|
| <b>Transcription regulators (floral) – inflorescence architecture – grain number</b> |                                                                                                                                                                                      |                                                                                                                                                                                                                   |                                                                                                                                                                                                                      |                                                                                                                                                                                                                                                                         |                                                                                                                 |
| QTL, mutant analyses <i>FT FLOWERIN G LOCUS</i>                                      | <i>Ppd-D1a</i> ( <i>Photoperiod-1</i> ) a member of the pseudo-response regulator gene family (PPR)                                                                                  | Controls photoperiod-dependent floral induction; regulates inflorescence architecture and paired spikelet development by modulating the strength of the floral promoting signal ( <i>FT</i> ); ortholog in barley | <i>Ppd-1</i> – major inhibitory effect on paired spikelet formation by regulating the expression of <i>FT</i><br><i>Ppd-D1a</i> loss of function allele – photoperiod-insensitive, promotes constitutive LD response | Temperate cereals – allelic variation in <i>Ppd-1</i> influences sensitivity to long-day conditions. Modulated expression of <i>Ppd-1</i> and <i>FT</i> can be used to form a wheat inflorescence with a better arrangement and increased number of grains in spikelets | (Beales et al. 2007; Boden et al. 2015; Li et al. 2011; Shaw et al. 2013; Shaw et al. 2012; Turner et al. 2005) |
| Natural mutants                                                                      | <i>FRIZZY PANICLE</i> ( <i>WFZP</i> ; <i>T. aestivum</i> ), <i>branched head</i> <sup>†</sup> ( <i>bh</i> <sup>†</sup> <i>T. turgidum</i> )<br>APETALA2/<br>Ethylene Response Factor | A key player in spikelet development during the floret meristem transition phase; non-canonical spike-branching; orthologs in barley, rice, maize                                                                 | Three <i>FZP</i> homologous genes <i>WFZP</i> – recessive, coding mutations of <i>WFZP-D</i> – cause the SS phenotype, the most severe in <i>FZP-D</i> lesions + <i>FZP-A</i> frameshift mutants                     | Multirow spike (MRS) in hexaploid wheat and tetraploid ‘Miracle-Wheat’, significantly more grains per spike, higher spike yield                                                                                                                                         | (Dobrovolskaya et al. 2015; Poursarebani et al. 2015)                                                           |
| Haplotypes, NILs, gene isolation, overexpression in <i>A. thaliana</i>               | <i>TaTEF-7A</i> ; TaTEF-7A transcript elongation factor                                                                                                                              | <i>OsTEF1</i> regulates the tillering process by inducing expression of cytochrome P450                                                                                                                           | <i>TaTEF-7A</i> allele – the highest expression in young spikes and developing seeds; overexpression in <i>A. thaliana</i>                                                                                           | Increased grain number, enhance grain length, silique number and silique length                                                                                                                                                                                         | (Paul et al. 2012; Zheng et al. 2014)                                                                           |
| Genome identification, gene cloning, phylogenetic                                    | <i>NFYAs</i> , <i>NFYBs</i> , <i>NFYCs</i> Nuclear Factor Y (NF-Y): subunits NF-YA, NF-YB, NF-YC                                                                                     | Essential role in root development and nitrogen and phosphorus usage; orthologs in maize ( <i>ZmNF-YB2</i> ) and other species                                                                                    | Each of the NF-Y subunits is encoded by multiple genes (18 <i>NFYAs</i> , 34 <i>NFYBs</i> , 28 <i>NFYCs</i> ). <i>TaNFYA-B1</i> is a low nitrogen and low phosphorus-inducible gene –                                | Increased grain yield and root development under control, low N and low P conditions, high yield with less fertilizer input                                                                                                                                             | (Qu et al. 2015; Yadav et al. 2015)                                                                             |

|                                                                                      |                                                                                                          |                                                                                                                                                                               |                                                                                                                                                                                       |                                                                                                                                 |                                                         |
|--------------------------------------------------------------------------------------|----------------------------------------------------------------------------------------------------------|-------------------------------------------------------------------------------------------------------------------------------------------------------------------------------|---------------------------------------------------------------------------------------------------------------------------------------------------------------------------------------|---------------------------------------------------------------------------------------------------------------------------------|---------------------------------------------------------|
| analysis, transgenic overexpression of <i>TaNf-YB4</i>                               | that bind to the CCAAT box, a ubiquitous eukaryotic promoter element                                     |                                                                                                                                                                               | increase in nitrogen and phosphorus uptake, upregulation of the expression of both nitrate and phosphate transporters in roots + down-regulation of miR169                            | Overexpression stimulates lateral branching. Transgenics increased grain yield by 20–30%.                                       |                                                         |
| QTL <i>Gpc-B1</i> , cloning, RNAi                                                    | <i>NAM-B1</i> NAC transcription factor                                                                   | <i>NAC</i> family genes regulate NAC protein level and localization and participate in transcription complex including microRNA: specific to plants                           | NAC accelerates senescence and improves grain protein, zinc and iron content; RNA reduction delayed senescence                                                                        | Grain size                                                                                                                      | (Uauy et al. 2006 a,b; rev. function Olsen et al. 2005) |
| Gene isolation, overexpression in transgenic wheat lines                             | <i>TaNAC2-5A</i> – a nitrate inducible and cereal-specific NAM, ATAF, and CUC (NAC) transcription factor | <i>TaNAC2-5A</i> binds to the promoter regions of the genes encoding nitrate transporter and glutamine synthetase; involved in nitrate signaling; members in other species    | Overexpression of <i>TaNAC2-5A</i> in wheat enhanced root growth and nitrate influx rate                                                                                              | Higher grain yield and higher nitrogen accumulation in aerial parts and allocated more nitrogen to grains in a field experiment | (He et al. 2015)                                        |
| RNAi                                                                                 | <i>TaABCC13</i> ; <i>TaABCC13</i> functional transporter                                                 | Functionally important for grain development and detoxification of heavy metals.                                                                                              | Silencing of <i>TaABCC13</i> reduced PA in mature grains and developmental defects                                                                                                    | Grain development                                                                                                               | (Bhati et al. 2016)                                     |
| <b>Genes of cytokinin metabolism – plant architecture – grain size</b>               |                                                                                                          |                                                                                                                                                                               |                                                                                                                                                                                       |                                                                                                                                 |                                                         |
| Haplotype variants                                                                   | <i>TaCKX6-D1</i> ; CKX – cytokinin dehydrogenase                                                         | CKX enzymes irreversibly degrade cytokinins; temporal and spatial control of cytokinin level; orthologs in barley, rice ( <i>OsCKX2</i> ) and family members in other species | Five haplotypes <i>a-e</i> . Haplotype <i>TaCKX6-D1a</i> associated with higher grain weight – decreased expression relative to haplo b in 8 DAP seeds; novel allele <i>TaCKX6a02</i> | Grain weight, grain size, filling rate                                                                                          | (Lu et al. 2015; Zhang et al. 2012)                     |
| Recombinant inbred lines (RIL) QTL                                                   | <i>TaCKX4</i> ; CKX - cytokinin dehydrogenase                                                            | As above                                                                                                                                                                      | Significant association of copy number variation of <i>TaCKX4</i> with flag leaf chlorophyll content after anthesis and grain weight                                                  | Grain weight                                                                                                                    | (Chang et al. 2015)                                     |
| <b>Gibberellin signaling – plant architecture – culm (stem) robustness/hardiness</b> |                                                                                                          |                                                                                                                                                                               |                                                                                                                                                                                       |                                                                                                                                 |                                                         |

|                                                            |                                                                                                       |                                                                                                                                                                                                  |                                                                                                                                                                                                                                                                                                                                                                                       |                                                                                                              |                                                                                |
|------------------------------------------------------------|-------------------------------------------------------------------------------------------------------|--------------------------------------------------------------------------------------------------------------------------------------------------------------------------------------------------|---------------------------------------------------------------------------------------------------------------------------------------------------------------------------------------------------------------------------------------------------------------------------------------------------------------------------------------------------------------------------------------|--------------------------------------------------------------------------------------------------------------|--------------------------------------------------------------------------------|
| Natural mutations                                          | <i>Rht-B1</i> and <i>Rht-D1</i> , <i>Rht-B1c</i> DELLA proteins that share an N-terminal DELLA domain | GR genes, transcriptional regulators that negatively regulate GA signaling, suggested regulation of GATA-like transcription factor; ortholog of <i>Arabidopsis GAI</i> and <i>SLN1</i> in barley | GA insensitive alleles of the <i>Rht-B1</i> and <i>Rht-D1</i> loci; semidominant mutations (more than 20); truncated proteins lacking the DELLA motif cannot respond to GA3; <i>Rht-B1c</i> partially dominant or co-dominant for plant height, differed from <i>Rht-B1a</i> by one 2 kb <i>Veju</i> retrotransposon insertion, primarily responsible for the extreme dwarfing effect | Reduced plant height and a compact lodging-resistance phenotype, effect on seed dormancy, and photosynthesis | (Pearce et al. 2011; Peng et al. 1999; Sun and Gubler 2004; Wen et al. 2013)   |
| Natural mutation, RIL, fine mapping                        | <i>Rht8</i> ; as above                                                                                | Reduced cell elongation; reduced sensitivity to brassinosteroids                                                                                                                                 | Not known                                                                                                                                                                                                                                                                                                                                                                             | Shorter intermodal segments and culm, improved lodging resistance; used in dry environments                  | (Gasperini et al. 2012)                                                        |
| <b>Cell division/proliferation regulators – grain size</b> |                                                                                                       |                                                                                                                                                                                                  |                                                                                                                                                                                                                                                                                                                                                                                       |                                                                                                              |                                                                                |
| QTL – rice, comparative genomics, cloning, TILLING         | <i>TaGW2</i> ( <i>GRAIN WIDTH 2</i> )<br><i>OsGW2</i> encodes an E3 RING ligase                       | <i>TaGW2-A</i> and <i>-D</i> act in both the cell division and late grain-filling phase; ortholog in rice                                                                                        | Homologs in the A, B, D genomes<br><i>TaGW2</i> – down-regulation, significant reduction in endosperm cell number; <i>gw2-A1</i> – significant increase of grain size and weight                                                                                                                                                                                                      | Grain size and weight                                                                                        | (Bednarek et al. 2012; Hong et al. 2014; Simmonds et al. 2016; Su et al. 2011) |
| Comparative genomics, haplotypes                           | <i>TaTGW6</i> indole-3-acetic acid-glucose hydrolase                                                  | Low expression of <i>TaTGW6</i> is associated with low IAA content and high grain weight; ortholog in rice ( <i>TGW6</i> )                                                                       | <i>TaTGW6-a</i> , <i>TaTGW6-A1b</i> – low TGW; <i>TaTGW6-A1a</i> (3 SNPs), <i>TaTGW6-b</i> (InDel mutant), <i>TaTGW6-c</i> (null mutant) – last two low or lack of expression and significant increase in grain size and weight                                                                                                                                                       | Thousand grain weight (TGW) and yield                                                                        | (Hanif et al. 2016; Hu et al. 2016)                                            |
| Comparative genomics                                       | <i>TaGS-D1</i>                                                                                        | Regulate stigma length and stigma extension in rice; ortholog of rice <i>OsGS3</i>                                                                                                               | InDels in the introns of the gene between genotypes – higher or lower TGW                                                                                                                                                                                                                                                                                                             | Grain weight and grain length                                                                                | (Zhang et al. 2014)                                                            |
| VIGS                                                       | <i>TaCYP78A3</i>                                                                                      | Affects the extent of                                                                                                                                                                            | Specifically expressed in wheat                                                                                                                                                                                                                                                                                                                                                       | Grain size: 11–48%                                                                                           | (Ma et al.                                                                     |

|                                                                      |                                                                                                                              |                                                                                                                                                          |                                                                                                                                                                                                        |                                                        |                                              |
|----------------------------------------------------------------------|------------------------------------------------------------------------------------------------------------------------------|----------------------------------------------------------------------------------------------------------------------------------------------------------|--------------------------------------------------------------------------------------------------------------------------------------------------------------------------------------------------------|--------------------------------------------------------|----------------------------------------------|
| silencing, overexpression ( <i>A. thaliana</i> )                     | cytochrome P450 CYP78A3 protein                                                                                              | integument cell proliferation                                                                                                                            | reproductive organs; positively correlated with the final seed size                                                                                                                                    | increase in <i>Arabidopsis</i> seed size               | 2015b)                                       |
| Comparative genomics, transgenic rice                                | <i>TaGS5-3A-T</i> , serine carboxypeptidases (SCPs), members of the <i>a/b</i> hydrolase proteins in the S_10 protein family | Promotes cell division by regulating cell cycle genes resulting in large grain size generated by an increased cell number; ortholog in rice <i>OsGS5</i> | <i>TaGS5-3A-T</i> preferentially expressed in young spikes and developing grains, significantly correlated with larger grain size and higher thousand kernel weight                                    | Larger grain size, larger kernel and yield             | (Ma et al. 2015a)                            |
| <b>Sucrose, starch metabolism – plant architecture – grain yield</b> |                                                                                                                              |                                                                                                                                                          |                                                                                                                                                                                                        |                                                        |                                              |
| Transgenic wheat, field trials                                       | <i>HvSUT1</i> , sucrose transporter (SUT)                                                                                    | Stimulates storage protein synthesis                                                                                                                     | Up-regulated gene expression of positive and negative regulators of sugar signaling and assimilate supply                                                                                              | Increased grain yield and micronutrient concentration  | (Saalbach et al. 2014; Weichert et al. 2010) |
| Comparative genomics, haplotypes                                     | <i>TaSus1</i> and <i>TaSus2</i> sucrose synthase SUS                                                                         | Sucrose synthase catalysis is the first step in the conversion of sucrose to starch                                                                      | Loci: <i>TaSus2-2A</i> , <i>TaSus2-2B</i> , <i>TaSus1-7A</i> , and <i>TaSus1-7B</i> main variations within the introns; significant differences between the haplotypes correlated with TKW differences | Larger grain size                                      | (Hou et al. 2014)                            |
| Haplotypes                                                           | <i>TaCWI</i> , cell wall invertase (CWI),                                                                                    | Wheat anther-specific invertase genes; hydrolyzes sucrose into glucose and fructose; orthologs in rice                                                   | <i>TaCWI-4A</i> , <i>TaCWI-5D</i> – SNPs<br><i>TaCWI-5B</i> – no polymorphism;<br><i>TaCWI-5D</i> significantly associated with TKW                                                                    | Higher thousand kernel weight                          | (Jiang et al. 2015)                          |
| Natural mutant                                                       | <i>T6P/SnRK1</i> trehalose6-phosphate (T6P)                                                                                  | T6P is the intermediary in TRE synthesis formed from glucose-6-phosphate and UDP-glucose; source/sink interaction                                        | Not known                                                                                                                                                                                              | Expected function to determine grain yield             | (reviewed by Lawlor and Paul 2014)           |
| RNAi                                                                 | <i>GWD</i><br>GWD – glucan, water-dikinase, the primary enzyme required for starch                                           | unclear                                                                                                                                                  | RNAi-mediated down-regulation (endosperm-specific promoter) – a decrease in starch phosphate content and an increase in grain size (+ increased level of $\alpha$ -amylase activity                    | Increases in grain size, early vigor and plant biomass | (Ral et al. 2013; Ral et al. 2012)           |

|                |                                |                                                                                                                                                         |                                                                                                                                              |                               |                      |
|----------------|--------------------------------|---------------------------------------------------------------------------------------------------------------------------------------------------------|----------------------------------------------------------------------------------------------------------------------------------------------|-------------------------------|----------------------|
|                | phosphorylation                |                                                                                                                                                         | in the aleurone layer during grain maturation)                                                                                               |                               |                      |
| Induced mutant | <i>Tin</i> (tiller inhibition) | Reduced tillering due to early cessation of tiller bud outgrowth during the transition of the shoot apex from the vegetative to the reproductive stage. | Upregulation of a gene induced by Suc starvation, downregulation of a <i>Suc-inducible</i> gene, and reduced Suc content in dormant tin buds | Reduced tillering (branching) | (Kebrom et al. 2012) |
